# Supplementary material
Source: PubMed Central journal article supplement (PMC3511747)
Supplement: 1213159109_pnas.201213159SI.pdf [file 1213159109_pnas.201213159SI.pdf]

# Supporting Information

Yang et al. 10.1073/pnas.1213159109

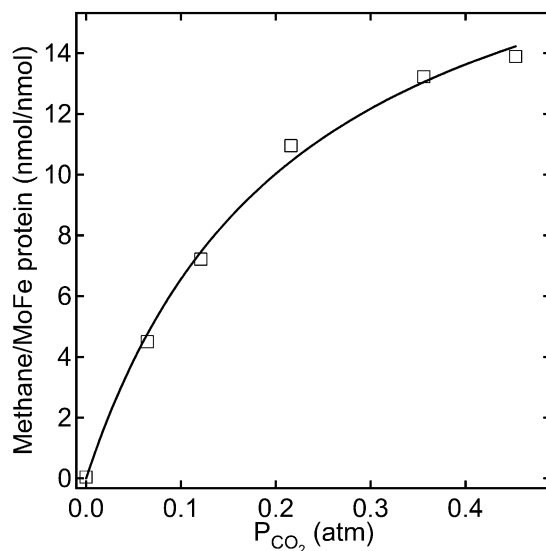

**Fig. S1.** Dependence of  $\text{CH}_4$  formation on partial pressure of  $\text{CO}_2$ . Methane production is shown under different partial pressure of  $\text{CO}_2$  catalyzed by  $\alpha\text{-}^{70}\text{Ala}/\alpha\text{-}^{195}\text{Gln}$  MoFe protein. The concentration of MoFe protein was 0.5 mg/mL, and Fe protein was 3 mg/mL. The reactions were incubated at 30 °C for 20 min. The data were fit to the Michaelis–Menten equation, yielding  $V_{\text{max}}$  of 21 nmol  $\text{CH}_4$ /nmol MoFe protein and  $K_m$  of 0.23 atm of  $\text{CO}_2$ .

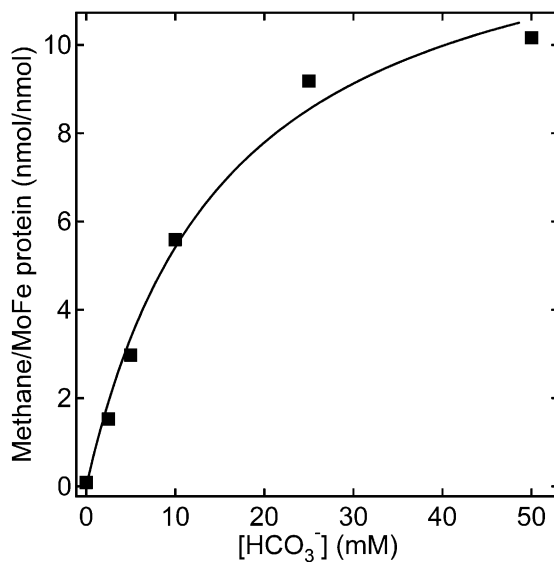

**Fig. S2.** Dependence of  $\text{CH}_4$  formation on concentration of  $\text{HCO}_3^-$ . The amount of  $\text{CH}_4$  formed as a function of the concentration of  $\text{HCO}_3^-$  is shown for the  $\alpha\text{-}^{70}\text{Ala}/\alpha\text{-}^{195}\text{Gln}$  MoFe protein. The assay contained 3 mg/mL Fe protein and 0.5 mg/mL MoFe protein. The assay was at 30 °C for 20 min. The data were fit to the Michaelis–Menten equation, yielding  $V_{\text{max}}$  of 14 nmol  $\text{CH}_4$ /nmol MoFe protein and  $K_m$  of 16 mM  $\text{HCO}_3^-$ .

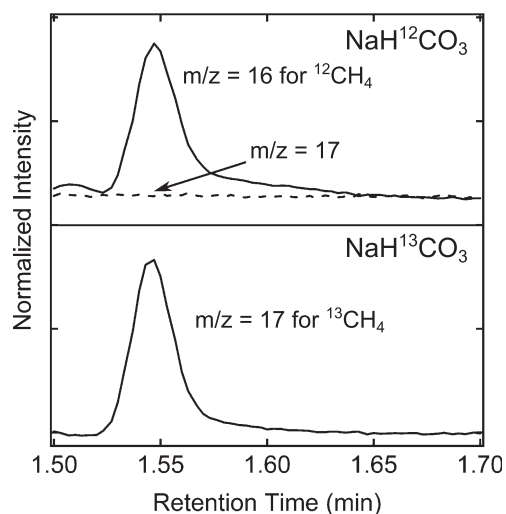

**Fig. S3.** GC-MS analysis of methane. A portion of the gas mixture of an assay with  $\alpha$ -70<sup>Ala</sup>/ $\alpha$ -195<sup>Gln</sup> MoFe protein and CO<sub>2</sub> was separated by gas chromatography, with detection by mass spectrometry. H<sup>12</sup>CO<sub>3</sub><sup>-</sup> (Upper) or H<sup>13</sup>CO<sub>3</sub><sup>-</sup> (Lower) were used as substrate. The peak eluting at 1.55 min was analyzed for molecular ion peak of <sup>12</sup>CH<sub>4</sub> or <sup>13</sup>CH<sub>4</sub> with a mass over charge ratio (*m/z*) of 16 or 17, as indicated.

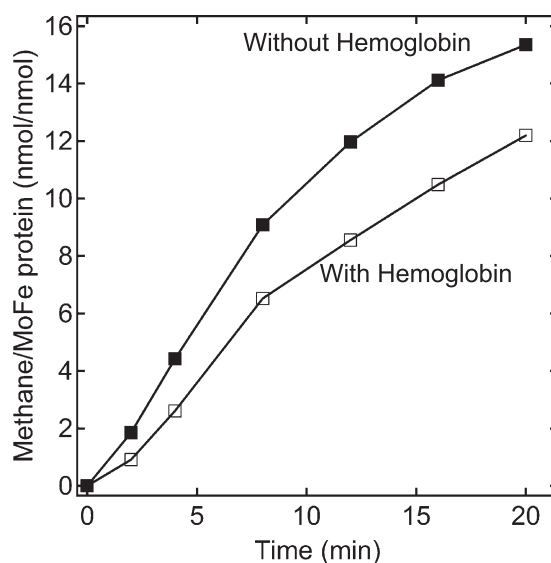

**Fig. S4.** Effect of hemoglobin on CH<sub>4</sub> formation. The formation of CH<sub>4</sub> for the  $\alpha$ -70<sup>Ala</sup>/ $\alpha$ -195<sup>Gln</sup> MoFe protein is shown as a function of time either without (■) or with 0.3 mg/mL hemoglobin (□). The partial pressure of CO<sub>2</sub> was 0.45 atm, the concentration of MoFe protein was 0.5 mg/mL, and Fe protein was 3 mg/mL. The reactions were conducted at 30 °C.
